# Supplementary material for: Establishment and Validation of a Noninvasive Diagnostic Model for Premature Coronary Artery Disease in Women
Source: Research Square preprint supplement (doi:10.21203/rs.3.rs-7715202/v1), 2025-12-08
Supplement: Supplementary file 1 [file 17f01de3469245eccae280f7.docx]

Table 1 Comparison of the baseline characteristics of the modeling cohort.

| Type | Training cohort | | | Validation cohort | | |
| --- | --- | --- | --- | --- | --- | --- |
| CAD group（n=156） | Non-CAD group (n=144) | P-value | CAD group（n=61） | Non-CAD group (n=44) | P-value |
| Age | 50±5.69 | 52.83±6.29 | 0.001 | 55.87±5.86 | 53.18±6.12 | 0.012 |
| Menopausal age | 45.22±14.03 | 46.01±12.87 | 0.351 | 48.97±2.99 | 48.90±3.14 | 0.098 |
| Family history of CAD | 16（10.25%） | 5（3.45%） | 0.024 | 14(19.71%） | 3（9.09%） | 0.032 |
| History of diabetes | 16（10.25%） | 1（0.69%） | 0.000 | 9（14.75%） | 1（2.30%） | 0.042 |
| Smoking | 1（0.65%） | 0（0.00%） | 0.336 | 2(3.28%） | 0（0.00%） | 0.508 |
| Hypertensive grade 1 | 15（9.60%） | 8（5.50%） | 0.201 | 6（9.83%） | 2（4.54%） | 0.465 |
| Hypertensive grade 2 | 32（20.50%） | 35（24.30%） | 0.488 | 17（27.87%） | 8(18.18%) | 0.352 |
| Hypertensive grade 3 | 54（34.60%） | 12（8.30%） | 0.002 | 19（31.15%） | 5(11.36%) | 0.019 |
| BMI | 24.43±3.21 | 23.69±3.20 | 0.049 | 24.45±2.99 | 23.69±3.20 | 0.052 |
