# Supplementary material for: Establishment and Validation of a Noninvasive Diagnostic Model for Premature Coronary Artery Disease in Women
Source: Research Square preprint supplement (doi:10.21203/rs.3.rs-7715202/v1), 2025-12-08
Supplement: Supplementary file 2 [file 19251ddb23906f0fb712ace9.docx]

Table 5 Independent risk factors selected from different noninvasive diagnostic model（P<0.05）

| **TYPE** | **Independent risk factors** | **AUC-value** |
| --- | --- | --- |
| LASSO | age, family history of CAD, hypertension grade, cTnI, abnormal ECG, HbA1c, proBNP, ApoAI, ApoAI/ApoB, ApoA, TC, Cys-C,menopause | 0.8267853 |
| SVM | age, family history of CAD, hypertension grade, cTnI, abnormal ECG, HbA1c, ApoAI/ApoB, Cr, Cys-C | 0.8284316 |
| Multivariate regression | | age, family history of CAD, hypertension grade, cTnI, abnormal ECG | 0.7989766 |
| Random forest | age, cTnI, TC, PBG, HbA1c, ApoAI, BMI,CysC ,UA | 0.7717464 |
