# Supplementary material for: Establishment and Validation of a Noninvasive Diagnostic Model for Premature Coronary Artery Disease in Women
Source: Research Square preprint supplement (doi:10.21203/rs.3.rs-7715202/v1), 2025-12-08
Supplement: Supplementary file 3 [file 30f533aa538d1bebbf2ab278.docx]

Table 2 Comparison of the characteristics of laboratory tests used in the modeling of the cohort.

| Yype | Training cohort | | | | Validation cohort | | | |
| --- | --- | --- | --- | --- | --- | --- | --- | --- |
| CAD group（n=156） | Non-CAD group (n=144) | P-value | | CAD group（n=61） | Non-CAD group (n=44) | | P-value |
| FBG(mmol/l) | 5.80±1.32 | 4.86±0.53 | | 0.133 | 6.04±2.03 | 5.79±1.41 | 0.300 | |
| PBG(mmol/l） | 7.68±3.16 | 6.69±2.69 | | 0.004 | 8.08±3.07 | 7.72±2.47 | 0.311 | |
| HbA1c（%） | 6.40±1.45 | 5.81±1.14 | | 0.001 | 6.15±1.16 | 6.02±1.13 | 0.035 | |
| CysC(mg/l) | 0.90±0.25 | 0.83±0.23 | | 0.019 | 0.85±0.16 | 0.85±0.15 | 0.042 | |
| WBC(109) | 6.65±1.87 | 6.59±1.81 | | 0.769 | 7.06±2.13 | 7.05±1.60 | 0.967 | |
| RBC(1012) | 4.31±0.80 | 4.46±0.54 | | 0.070 | 4.43±0.60 | 4.54±0.50 | 0.141 | |
| PLT(109) | 257.31±61.69 | 260.54±59.74 | | 0.646 | 258.53±60.97 | 260.60±56.67 | 0.772 | |
| HGB(g/l) | 125.08±11.66 | 123.38±13.46 | | 0.242 | 125.43±13.87 | 128.88±15.31 | 0.404 | |
| HsCRP(mg/l) | 2.37±2.71 | 1.92±2.14 | | 0.216 | 2.46±1.89 | 2.57±1.88 | 0.163 | |
| MPV(fL) | 9.32±1.33 | 14.29±3.16 | | 0.172 | 9.07±1.10 | 9.25±1.05 | 0.299 | |
| PDW(fL) | 0.138±0.03 | 0.24±0.92 | | 0.075 | 0.16±0.01 | 0.17±0.01 | 0.375 | |
| D-Dimer(ng/ml) | 138.59±133.27 | 123.50±112.14 | | 0.295 | 0.27±0.34 | 0.24±0.19 | 0.368 | |
| cTnI(ng/ml) | 0.0357±0.19 | 0.003±0.00 | | 0.039 | 0.025±0.08 | 0.014±0.00 | 0.170 | |
| proBNP(pg/ml) | 144.20±223.07 | 70.53±112.01 | | 0.000 | 96.28±22.48 | 102.69±22.51 | 0.014 | |
| CKMB/CK | 0.197±0.11 | 0.183±0.09 | | 0.222 | 0.16±0.10 | 0.16±0.09 | 0.972 | |
| CKMB(U/l) | 14.11±6.59 | 13.85±8.47 | | 0.795 | 12.91±5.94 | 13.75±6.02 | 0.229 | |
| CK(U/l) | 86.94±53.52 | 84.42±44.30 | | 0.658 | 100.29±63.73 | 103.65±71.62 | 0.654 | |
| LDH(U/l) | 170.90±42.00 | 155.63±44.30 | | 0.001 | 173.65±47.64 | 167.06±51.47 | 0.238 | |
| ApoAI(g/l) | 1.259±0.23 | 1.328±0.21 | | 0.007 | 1.24±0.21 | 1.29±0.25 | 0.024 | |
| ApoB(g/l) | 0.883±0.25 | 0.86±0.24 | | 0.103 | 0.95±0.19 | 0.94±0.22 | 0.435 | |
| ApoAI/ ApoB | 1.53±0.49 | 1.72±0.57 | | 0.003 | 1.37±0.46 | 1.49±0.62 | 0.041 | |
| Lp(a)(g/l) | 0.335±0.34 | 0.262±0.27 | | 0.051 | 0.32±0.31 | 0.27±0.30 | 0.116 | |
| TC(mmol/l) | 4.83±1.50 | 4.59±1.13 | | 0.128 | 4.95±1.09 | 4.86±1.04 | 0.465 | |
| TG(mmol/l) | 1.88±1.76 | 1.39±0.83 | | 0.002 | 1.67±1.09 | 1.72±1.16 | 0.635 | |
| HDL(mmol/l) | 1.22±0.37 | 1.35±0.33 | | 0.415 | 1.38±0.27 | 1.42±0.30 | 0.299 | |
| LDL(mmol/l) | 2.82±1.01 | 2.71±0.99 | | 0.349 | 3.06±0.97 | 2.88±0.99 | 0.113 | |
| Cr(mmol/l) | 67.44±50.11 | 61.58±12.68 | | 0.173 | 64.00±18.58 | 62.61±18.04 | 0.523 | |
| Bun(mmol/l) | 5.41±3.90 | 5.30±4.42 | | 0.852 | 4.63±1.90 | 4.67±1.91 | 0.867 | |
| UA(mmol/l) | 326.32±93.09 | 303.52±78.16 | | 0.025 | 318.92±84.98 | 318.78±93.70 | 0.989 | |
| Ccr(ml/min) | 92.56±17.41 | 97.07±15.15 | | 0.019 | 111.16±27.43 | 118.38±26.19 | 0.023 | |
