# Supplementary material for: Establishment and Validation of a Noninvasive Diagnostic Model for Premature Coronary Artery Disease in Women
Source: Research Square preprint supplement (doi:10.21203/rs.3.rs-7715202/v1), 2025-12-08
Supplement: Supplementary file 4 [file 52fa18363c7675fe41e703dd.docx]

Table 4 Univariate logistic regression of risk factors associated with PCAD in women.

| Type | Univariate logistic regression | | | Multivariate logistic regression | | |
| --- | --- | --- | --- | --- | --- | --- |
| OR | 95%CI | P | OR | 95%CI | P |
| Age | 1.08 | 1.05-1.02 | 0.001 | 1.01 | 1.00-1.02 | 0.019 |
| Pausimenia or not | 4.24 | 2.26-8.43 | 0.000 | 1.03 | 0.84-1.26 | 0.800 |
| Family history of CAD | 3.22 | 1.22-10.07 | 0.026 | 1.23 | 1.00-1.50 | 0.047 |
| Hypertension | 2.73 | 1.72-4.38 | 0.000 | 0.87 | 0.69-1.10 | 0.239 |
| Hypertension grade | 1.66 | 1.37-2.03 | 0.000 | 1.42 | 1.04-1.25 | 0.005 |
| ApoAI | 0.22 | 0.07-0.66 | 0.008 | 0.85 | 0.64-1.11 | 0.231 |
| Lp a | 2.32 | 1.09-5.20 | 0.032 | 1.76 | 0.99-1.39 | 0.056 |
| ApoAI/ApoB | 0.53 | 0.34-0.82 | 0.005 | 0.95 | 0.85-1.07 | 0.410 |
| BMI | 1.07 | 1.00-1.16 | 0.049 | 1.00 | 0.98-1.02 | 0.941 |
| TG | 1.44 | 1.14-1.90 | 0.005 | 1.01 | 0.97-1.06 | 0.532 |
| Ccr | 0.98 | 0.97-0.99 | 0.024 | 1.00 | 1.00-1.01 | 0.217 |
| UA | 1.00 | 1.00-1.01 | 0.026 | 1.00 | 0.99-1.00 | 0.796 |
| Pro-BNP | 1.00 | 1.00-1.01 | 0.003 | 1.00 | 0.99-1.00 | 0.422 |
| cTnI | 3.42 | 4.66-6.25 | 0.002 | 1.47 | 1.00-2.15 | 0.048 |
| CysC | 3.65 | 1.30-11.50 | 0.019 | 1.21 | 0.90-1.62 | 0.199 |
| HbA1c | 1.70 | 1.32-2.29 | 0.000 | 1.08 | 0.99-1.17 | 0.057 |
| FBG | 1.24 | 1.03-1.56 | 0.043 | 1.00 | 1.00-1.50 | 0.047 |
| PBG | 1.15 | 1.05 -1.27 | 0.003 | 0.99 | 0.95-1.02 | 0.308 |
| LDH | 1.01 | 1.00-1.02 | 0.002 | 1.00 | 0.99-1.00 | 0.558 |
| Abnormal ECG | 2.86 | 1.79-4.60 | 0.000 | 1.21 | 1.09-1.34 | 0.000 |
